1 **Spider viscid silk sticks better to superhydrophobic surfaces.**

2 Angela M. Alicea-Serrano<sup>1</sup>, K Zin Htut<sup>2</sup>, Alissa J. Coonfield<sup>1</sup>, Katherine Karkosiak<sup>1</sup>, Ali  
3 Dhinojwala<sup>2</sup>, Todd A. Blackledge<sup>1</sup>

4 <sup>1</sup>Department of Biology and Integrated Bioscience, University of Akron, Ohio

5 <sup>2</sup>Department of Polymer Science, University of Akron, Ohio

6

7 **ABSTRACT**

8 In a likely coevolutionary arms race, insects evolved a variety of counter strategies to avoid  
9 capture by spider webs, while spiders' evolved innovations web structure and especially their  
10 adhesive silks. For instance, insects' cuticles employ a variety of potential anti-adhesion  
11 mechanisms such as the detachable scales of moths and surface waxes and superhydrophobic  
12 structures that might resist spreading of glues. In contrast, the viscid capture threads of most  
13 spider orb webs are covered with aggregate glue droplets that absorb atmospheric water, tuning  
14 glue viscosity to balance the competing demands of surface spreading versus maintaining  
15 strong bulk cohesion. Here, we test the hypothesis that superhydrophobicity in insects acts as  
16 an anti-adhesion defense against spider silk. We used lotus leaves as a model substrate  
17 because its superhydrophobicity outperforms most known insect surfaces. The adhesion of  
18 spider capture silk from the web of *Larinioides cornutus* was studied against three substrates:  
19 raw lotus leaves, oxygen plasma treated lotus leaves (hydrophilic lotus), and smooth glass,  
20 differing in roughness and chemistry. We found that spider capture silk sticks better to the  
21 superhydrophobic lotus than to other surfaces. Both chemistry and physical properties of the  
22 leaves contribute to higher adhesion, as raw lotus showed a mean increase in adhesion of 74 %  
23 compared to glass, while the similar surface roughness of the hydrophilic lotus increased  
24 adhesion by 64 % compared to glass. Thus, evolving a hydrophobic cuticle is unlikely to be a  
25 defensive trait used to mitigate the effectiveness of spider webs.

26 **INTRODUCTION**

27 Spiders are diverse and important predators of insects in nearly every terrestrial ecosystem on  
28 earth (Garrison et al., 2016; Vollrath and Selden, 2007). Spiders in the superfamily Araneoidea  
29 are among the most successful predators of flying insects due in part to their use of a wet sticky  
30 silk, known as viscid silk (Blackledge et al., 2009; Bond and Opell, 1998; Coddington and Levi,  
31 1991; Opell and Bond, 2001; Tarakanova and Buehler, 2012). Viscid silk is used by modern orb

1 weaving spiders to build the capture spiral of their web, which functions to retain prey hitting the  
2 web until the spider is able to subdue it (e.g. Blackledge and Zevenbergen 2006). Viscid silk is  
3 made of an axial fiber of flagelliform silk coated by evenly spaced glue droplets of adhesive silk  
4 from the aggregate gland, both of which stretch and deform during pull-off from prey by  
5 implementing a suspension bridge mechanism that recruits glue droplets to simultaneously  
6 transfer forces from droplet-to-droplet and from droplet-to-axial fiber (Opell and Hendricks 2007;  
7 Liao et al. 2015). Glue in viscid silk is made of glycoproteins, lipids, and hygroscopic low  
8 molecular mass compounds (LMMC) (Choresh et al., 2009; Jain et al., 2018; Townley and  
9 Tillinghast, 2013; Townley et al., 1991; Vollrath and Edmonds, 1989; Vollrath and Tillinghast,  
10 1991; Vollrath et al., 1990). The water-soluble LMMC's are humidity-responsive, and aid in  
11 plasticizing the glycoproteins –which serve as the adhesive component and are not soluble in  
12 water (Opell et al., 2011; Opell et al., 2013; Sahni et al., 2010; Sahni et al., 2011; Sahni et al.,  
13 2014)– and also remove interfacial water (Singla et al., 2018). Variation in composition of LMMC  
14 helps to tune glue hygroscopicity to achieve an “ideal” viscosity for a spider’s foraging  
15 environment by allowing the glue to spread enough to cover a high surface area but without  
16 risking premature cohesive failure from the thread (Amarpuri et al., 2015; Amarpuri et al., 2017;  
17 Jain et al., 2018). While the mechanism of glue adhesion is very well understood on smooth  
18 hydrophilic substrates, particularly glass, glue behavior on more realistic rough and hydrophobic  
19 substrates has not been investigated in detail.

20 In a possible coevolutionary arms race, insects evolved a variety of counter strategies to avoid  
21 capture by orb weaving spiders (Blackledge et al., 2009; Penney, 2004). These counter  
22 strategies include escape behaviors, sacrificial scales of moths and butterflies, and potentially  
23 the microstructure and chemistry of the chitin exoskeleton itself. Insect cuticles are multilayered  
24 composites of chitin and proteins and many cuticles are hydrophobic due to specialized  
25 protuberant structures or waxes present in the epicuticle (e.g. Watson et al. 2011). Cuticular  
26 waxes play a key role not only in preventing desiccation (Bott et al., 2017) but also hypothesized  
27 to function in several other ways, such as facilitating mating success (Chung and Carroll, 2015).  
28 Superhydrophobicity in insect cuticles may function in anti-fouling, anti-fogging, or anti-  
29 reflectance (e. g. Bott et al. 2017). Anti-wetting is also hypothesized to function as protection  
30 against spider webs by preventing effective spreading of adhesive glue droplets (Masters and  
31 Eisner, 1990; Watson et al., 2011). Some moth-specialist spiders in the subfamily  
32 Cyrtarachninae use large, over-lubricated glue droplets for quick spreading underneath  
33 superhydrophobic cuticles (Cartan and Miyashita, 2000; Diaz et al., 2018; Diaz et al., 2020) and  
34 cribellate spiders sometimes leverage capillary forces of epicuticular waxes of insects along the

1 adhesive nanofibers to enhance adhesion (Bott et al., 2017). Most ecribellate orb weaving  
2 spiders, however, are prey generalists whose water-based glue is maximally adhesive when it  
3 balances the contributions of interfacial spreading and bulk cohesion during pull-off (Amarpuri et  
4 al., 2015). Thus, poor wetting of superhydrophobic cuticles could provide a very effective  
5 defense strategy that has been over-looked by most research on viscid silk function which  
6 investigates adhesion primarily on smooth, hydrophilic glass surfaces.

7 Insect cuticles vary widely in hydrophobicity—from cockroaches with a contact angle below  $90^\circ$   
8 to mayflies, lacewing flies, butterflies, and moths with a contact angle ranging well above  $130^\circ$   
9 (Wagner et al., 1996). Because much of this variation in hydrophobicity is confounded with  
10 macroscale features such as setae and sacrificial scales that can strongly influence adhesion,  
11 we chose to explore the effects of hydrophobicity using a different system – the lotus leaf. The  
12 lotus leaf ranks as one of the most super-hydrophobic surfaces in nature with a water contact  
13 angle of around  $150^\circ$ , giving it self-cleaning properties that are of great interest for biomimicry.  
14 Lotus leaf superhydrophobicity results from a hierarchical structure of randomly oriented  
15 hydrophobic wax nano-tubules on the top of convex cellular micro-papillae (Figure 1) (Barthlott  
16 and Neinhuis, 1997). However, the leaves are otherwise smooth, lacking hairs and other  
17 potentially entangling macro-structure, making them a good comparison to the commonly used  
18 glass surfaces used in various studies on spider silk adhesion. Here, we test the effects of  
19 substrate hydrophobicity *per se* on the adhesion of the spider silk, to test the hypothesis that  
20 superhydrophobicity can be utilized by insects to mitigate the effectiveness of spider viscid silk.  
21 Results from this project will help in the development of a more robust understanding of the  
22 ecology of orb weaving spiders and their success at catching flying prey, as well as the  
23 advancement of technology to create biomimetic adhesives.

## 24 **METHODS**

### 25 **Spider maintenance and silk collection**

26 *Larinioides cornutus* (Araneae: Araneidae) orb weaving spiders were collected from two  
27 locations near Bath Township in Akron, Ohio, USA. Spiders were housed in cages (37cm width  
28 x 38 cm height x 11.5 cm depth) and kept at the University of Akron to build webs. Spiders  
29 were fed a cricket diet after every web collection (up to three times per week), and sprayed with  
30 water every afternoon before nighttime, the time at which *L. cornutus* normally builds. Single  
31 strands of capture silk were collected from interior rows in the bottom side of the web, by  
32 securing it across 12.58 mm cardboard frames using Elmer's glue (©Borden Inc.) and then

1 cutting using a soldering iron. Samples were stored in a dark sealed box, avoiding exposure to  
2 dust and UV light for up to 34 days until testing.

### 3 **Substrate preparation and surface energy testing**

4 To test the adhesive properties of capture silk on a superhydrophobic substrate, lotus (*Nelumbo*  
5 *nucifera*) leaves were used as a substrate. Lotus leaves are notorious for their low surface  
6 energy and self-cleaning properties. Because of their hierarchical surface made of micro  
7 papillae and nano wax tubules, water cannot spread on its surface. To decouple the effect of  
8 surface chemistry from the surface topography, lotus leaves were plasma treated with oxygen  
9 for 5 minutes (Harrick Plasma, PDC-32G), making the leaves superhydrophilic by depositing a  
10 layer of OH ions at the outermost surface of the leaf. Capture silk was also tested on smooth  
11 hydrophilic glass as a control. Water contact angles were measured on both hydrophilic and raw  
12 lotus leaves with Kruss Dynamic Shape Analyzer by depositing 10  $\mu$ L droplets on these  
13 surfaces to provide insights into the surface energy of these substrates. Six fresh leaves from  
14 four different plants were used and three droplets for each leaf were tested for determining  
15 average water contact angles. The resulting images were analyzed using contact angle analysis  
16 plug-in with image J software (Schneider et al., 2012).

### 17 **Adhesion testing**

18 A total of 120 threads from 40 webs were tested across all three substrates ( $n = 40$  each for raw  
19 lotus leaves, hydrophilic lotus leaves, and glass) so that any variation among webs in stickiness  
20 was evenly distributed across treatments. Substrates were made from the same leaves used in  
21 contact angle measurements, by adhering them to tick cardboard using double sided tape and  
22 cutting them into rectangles. All substrates had the same width (5 mm) to control for the length  
23 of capture silk coming in contact. Adhesive properties were tested using the Nano Bionix®  
24 Tensile tester (MTS Nano Instrument Innovation Center) by bringing individual threads in  
25 contact with the substrate and measuring pull-off forces. Threads were brought in contact with  
26 the substrate at a constant speed of 0.1 mm/s until a 15 nN preload, held in place for six  
27 seconds, and then pulled off until detachment using the same speed of 0.1 mm/s. Each thread  
28 was tested once on a discrete part of the substrate. All tests were done at  $60 \pm 5$  % relative  
29 humidity, the condition at which the glue of *L. cornutus* shows maximum adhesion on glass  
30 (Amarpuri et al., 2015). Humidity was controlled inside a humidity chamber using nitrogen gas  
31 and de-ionized water. Work of adhesion, or energy it takes to unstick from the substrate, was  
32 calculated as the area under the load-extension curve. Peak load during pull-off and total

1 extension of the capture silk were also measured. A one-way analysis of variance (ANOVA) was  
2 used, with an alpha level of 0.05, to determine if the average per web work of adhesion, peak  
3 force of adhesion and extension were different for each substrate. Tukey HSD was performed  
4 *post hoc* to determine pairwise differences among groups per variable. All statistical testing and  
5 graphing was performed using the JMP® Pro 14 software (©SAS Institute Inc.).

## 6 **Imaging**

7 A scanning electron microscope (SEM) (Model JEOL-7401 Japan Electron Optics Laboratory  
8 (JEOL)) was used to visualize (1) the morphology of the lotus, (2) the glue sticking behavior on  
9 the lotus leaf, and (3) the substrates after adhesion tests. Samples for 1 and 2 were observed in  
10 their native state without any sputter coating, in high vacuum operating at 1-3 kV, and were also  
11 visualized using a Keyence© VHX-7000 digital microscope (Keyence Corporation of America).  
12 Two leaves were used to observe the morphology of lotus before and after the oxygen plasma  
13 treatment. For 3, all substrates used in adhesion testing were visualized after testing to see if  
14 any glue residue was left behind. Samples were sputter coated for 45 seconds with gold, and  
15 observed in high vacuum operating at 1-3 kV. Any cohesive failure observed was recorded by  
16 counting the number of threads leaving visible glue residue (Figure 4 b1 and c1). A percentage  
17 of cohesive failure was calculated for each substrate by dividing the number of threads with  
18 cohesive failure by the total number of threads tested in that substrate.

## 19 **RESULTS**

### 20 **Surface energy**

21 Lotus leaves have a low surface energy and self-cleaning properties due to a hierarchical  
22 surface made of micro papillae and nano wax tubules, on which water cannot spread. To  
23 decouple these two confounded factors (surface chemistry and topography), we oxygen plasma  
24 treated lotus leaves making them hydrophilic. Both hydrophilic substrates (hydrophilic lotus and  
25 glass) showed contact angles of zero degrees (°) while, raw lotus leaf had an average contact  
26 angle of  $143.6 \pm 1.2$  ° (Figure 2). Visually, the stomata (pores found in leaves for the exchange  
27 of gas and water) in hydrophilic lotus leaves looked conspicuous under SEM pictures due to  
28 some process of plasma treatment, while they were unnoticeable for raw lotus (Figure 2). No  
29 other visual differences between the two lotus treatments were observed. Therefore, we defined  
30 our three substrates as smooth / hydrophilic (glass), rough / hydrophilic (plasma treated lotus)  
31 and rough / hydrophobic (raw lotus).

## 1 **Adhesion**

2 We tested the adhesive properties of capture silk from *Larinioides cornutus*' webs on raw  
3 (rough/ hydrophobic) and plasma treated (rough/ hydrophilic) lotus leaves and glass (smooth/  
4 hydrophilic) substrates, which have varying roughness and surface chemistry. We found that  
5 overall capture silk outperforms on hydrophobic lotus than the other two substrates. Adhesion  
6 was higher on raw lotus leaf with a mean work of  $5.25 \times 10^{-6} \pm 5.3 \times 10^{-7}$  J, 1.5 times higher than  
7 the adhesion of capture silk on hydrophilic lotus ( $3.82 \times 10^{-6} \pm 3.48 \times 10^{-7}$  J) and ~4 times higher  
8 than work of glue pulling-off from glass ( $1.38 \times 10^{-6} \pm 1.15 \times 10^{-7}$  J) ( $F(2,177) = 27.5958, p <$   
9  $0.0001$ ; Figure 3 a, b). The differences in the work of adhesion for the three substrates were  
10 driven by both the force during pull-off and the extension of capture silk. Hydrophobic lotus had  
11 both a significantly higher pull off force and a higher extension ( $918 \pm 56.2 \mu\text{N}$ ;  $15.5 \pm 0.8$  mm),  
12 followed by hydrophilic lotus ( $745 \pm 45.1 \mu\text{N}$ ;  $12.8 \pm 0.7$  mm) and glass ( $375 \pm 28.8 \mu\text{N}$ ;  $10.3 \pm$   
13  $0.4$  mm) ( $F(2, 117) = 38.3490, p < 0.0001$ ;  $F(2, 117) = 15.6560, p < 0.0001$ ; Figure 3 a, c, d).

14 After substrates were used to test adhesion, we examined them to see if glue residue was left  
15 behind. We found that about 40 % of capture silks tested on raw and hydrophilic lotus left glue  
16 behind due to cohesive failure inside the glue (Figure 3). Cohesive failure was observed to be  
17 equally abundant on both raw and hydrophilic lotus (Figure 3 a). An interesting behavior was  
18 observed for the capture silk glue as it interacted with the lotus rough surface, where glue  
19 tendrils formed at the peaks of papillae (Figure 3 b, c). This behavior was almost exclusively  
20 found on the residual glue on raw lotus leaves, while it was only observed in a few instances for  
21 hydrophilic lotus. Furthermore, tendrils observed on hydrophilic lotus only occurred in places  
22 where papillae were close together causing these tendrils to be very short and thick relative to  
23 the ones found on raw lotus.

## 24 **DISCUSSION**

25 We tested the hypothesis that superhydrophobic surfaces could mitigate the effectiveness of  
26 spider capture threads by comparing spider silk adhesion on raw lotus leaves to glass and  
27 hydrophilic plasma-treated lotus leaves. We rejected the hypothesis because spider silk  
28 adhered most effectively to raw superhydrophobic lotus leaves compared to glass, the substrate  
29 mostly used to test glue stickiness. The ability of aggregate glue to effectively adhere to  
30 superhydrophobic substrates implies that insects have limited potential to evolve cuticular  
31 chemistries and micro-morphology as defenses against spider webs.



1 Variation in cuticular chemistry and microstructure plays a key role in how insects interact with  
2 their environment (Gullan and Cranston, 2014). For instance, specific cuticular microstructures  
3 can help insects thrive in aquatic, aerial, and arid environments (e.g. plastrons help with oxygen  
4 retention in aquatic environments; bristles, scales and microtrichia can decrease friction  
5 between air and cuticle to enhance aerodynamics; and leaf-like bristles aid in water retention  
6 useful in arid conditions) (Gorb, 2001). Other insects may have evolved cuticular features that  
7 function as anti-predator specializations against ubiquitous spider webs in the environment. For  
8 example, scales of butterfly/moths and, hairs in caddisfly and lacewing allow them to rapidly  
9 escape most orb webs by scarifying or shedding these layers (Eisner et al., 1964; Masters and  
10 Eisner, 1990; Nentwig, 1982). Indeed, in a coevolutionary arms race, insects and spiders  
11 potentially drove each other into diversification (Vollrath and Selden, 2007). However, our  
12 results argue that cuticular hydrophobicity and topography is an unlikely strategy to evolve as a  
13 general defense against gluey spider silks.

14 Unlike glue from other systems, like the one produced by the pupa of fruit flies, that successfully  
15 adhere to substrates with different roughness and chemistries (Borne et al., 2020), we found  
16 that glue adhere better to lotus leaf than smooth glass. Roughness is more important than  
17 chemistry for explaining the higher adhesion of capture silk on lotus leaf compared to glass (raw  
18 hydrophobic lotus: 74% vs hydrophilic lotus: 64 % change from glass). Roughness likely  
19 improves adhesion in two ways, increasing the total surface area for glue to adhere to in a given  
20 space and incorporating shear forces into adhesion. Previous work on the effect of macroscale  
21 cuticular features, such as hairs and setae, on adhesion also found that roughness could  
22 improve adhesion by increasing the total effective surface area of adhesion when setae were  
23 smaller than glue droplets but reduced adhesion when setae were much larger than glue  
24 droplets and therefore prevented effective contact (Opell and Schwend 2007). Capture silk used  
25 in our study, from webs of *Larinioides cornutus* have droplets that are larger than lotus papillae,  
26 and many of these papillae can be covered by a single droplet (Figure 2).

27 The 10 % increase in stickiness due to chemical differences between hydrophobic lotus and the  
28 plasma-treated hydrophilic lotus can be explained by overspreading of the glue (Amarpuri et al.  
29 2017, 2015). Due to overspreading the contact line gets pinned and the stress is experienced by  
30 a small volume of glue, and this leads to an early cohesive failure. This was also reflected in  
31 lesser extension during retraction for plasma-treated hydrophilic compared to hydrophobic lotus.  
32 For hydrophobic lotus we also observed a novel behavior where tendrils or filaments of glue  
33 formed at the peaks of lotus papillae as glue pulled off from the substrate. These tendrils

1 occurred almost exclusively on raw lotus. We believe that the retraction of glue on hydrophobic  
2 lotus is much smoother and gets pinned only at the tip of the papillae. This results in the glue  
3 getting drawn into thin filaments (Figure 4c, 5b) resulting in the formation of beads on a string  
4 (BOAS) morphology (Figure 4c), similar to the thinning behavior of saliva stretched between a  
5 thumb and forefinger (Schipper, Silletti, and Vingerhoeds 2007). The stretching of the filaments  
6 also results in higher extensibility. The tendril formation was not observed for hydrophilic lotus  
7 (observed in less than 1% of the strand tested) because the glue droplet has spread further and  
8 was pinned on locations other than the papillae. Thus, we think that during pull-off of viscid silk  
9 from the lotus substrate, large volume of the glue participates in resisting the pull off, resulting in  
10 higher extensibility (Figure 3 d), higher peak loads (Figure 3 c) and formation of filaments that  
11 are thinner and, in some cases, BOAS (Figure 4 c). In both cases, glue is left behind on the  
12 surfaces, indicating that a complete detachment of the glue does not take place on both raw and  
13 hydrophilic lotus. In future, imaging the glue droplet during spreading and detachment is  
14 necessary to confirm this proposed mechanism. Additionally, viscid glue may generate  
15 additional adhesive forces through physical interactions with surface lipids since  
16 superhydrophobicity of lotus is only for water and it may not be for glue droplets that contain  
17 LMMC or other lipid like compounds. However, testing this hypothesis is out of the scope of this  
18 work.

19 Our study found that spider capture silk sticks better to the superhydrophobic surface of lotus.  
20 This finding is highly important for the understanding of the coevolution between insects and  
21 spider's gluey silk. Although other factors, such as web architecture and both insect and spider  
22 behavior contribute to the spider's success in trapping prey, our results show that evolving a  
23 superhydrophobic surface does not defend insects against spider webs, and capture silk.  
24 Humidity where adhesion is maximum may be a function of surface roughness and chemistry  
25 and therefore, understanding adhesion behavior of spider glue on heterogeneous surfaces is  
26 essential for developing tunable adhesives with multi-functional capabilities for biomedical,  
27 industrial, and robotic fields due to their unique and tunable viscoelastic properties.

28

29 Figure 1. Lotus leaf is classic example of a superhydrophobic surface. This property is possible  
30 due to its hierarchical structure of micro papillae and nano wax tubules (not visible).

31 Figure 2. Diagram showing the process of oxygen plasma-treatment. Plasma-treatment results  
32 in oxidation of non-polar methyl and methylene groups of waxes to polar carboxylic and



1 hydroxyl groups using oxygen ions available in air plasma changing the chemistry from a non-  
2 wetting to a complete wetting state. It dramatically increases the ability of water to wet the leaf  
3 surface.

4 Figure 3. Viscid capture silk pull-off testing results for three substrates: (red) raw lotus, (light  
5 blue) hydrophilic lotus and (dark blue) glass. a) Load-extension curves representative of the  
6 average performance of capture silk on each of the substrates. b) Work of adhesion results  
7 showed glass had the lowest adhesion while the raw lotus had the higher adhesion. c, d) Work  
8 of adhesion was driven by both force of adhesion and extension of the capture silk as both  
9 showed the same trend as that observed in the work of adhesion.

10 Figure 4. a) Percentage of cohesive failure of glue from capture silk observed on hydrophilic and  
11 raw lotus was the same for both treatments. Multiple papillae are cover by a single droplet of the  
12 capture silk increasing the surface area of contact and glue tendrils formed on the peaks of  
13 papillae. Tendrils observed on (b) hydrophilic lotus were scarce and only happened in really  
14 closely together papillae causing them to be short. Tendril formation was almost exclusively  
15 found in (c) raw lotus.

16 Figure 5. Hypothetical model for viscid glue pull-off from a) hydrophilic lotus and b) raw lotus.  
17 Droplets on hydrophilic lotus spread thinly, coating a large area but causing failure in the bulk at  
18 the periphery. Glue on raw lotus spreads ideally, allowing bulk cohesive forces to resist  
19 deformation at the periphery, while tendrils formed at peaks in papillae due to thinning.

20

## 21 **ACKNOWLEDGEMENTS**

22 We would like to thank Kaleb Wells for his help in data collection, spider care and plants care,  
23 and for silk collection. We would also thank Saranshu Singla and Daniel Maksuta for reviewing  
24 and useful comments during the development of this study and the manuscript.

25

## 26 **LITERATURE CITED**

27 **Amarpuri, G., Zhang, C., Diaz, C., Opell, B. D., Blackledge, T. A. and Dhinojwala, A.** (2015).  
28 Spiders Tune Glue Viscosity to Maximize Adhesion. *ACS Nano* **9**, 11472–11478.

29 **Amarpuri, G., Zhang, C., Blackledge, T. A. and Dhinojwala, A.** (2017). Adhesion modulation  
30 using glue droplet spreading in spider capture silk. *J. R. Soc. Interface* **14**, 20170228.

- 1 **Barthlott, W. and Neinhuis, C.** (1997). Purity of the sacred lotus, or escape from contamination  
2 in biological surfaces. *Planta* **202**, 1–8.
- 3 **Blackledge, T. A. and Zevenbergen, J. M.** (2006). Mesh width influences prey retention in  
4 spider orb webs. *Ethology* **112**, 1194–1201.
- 5 **Blackledge, T. A., Scharff, N., Coddington, J. A., Szü, T., Wenzel, J. W., Hayashi, C. Y. and**  
6 **Agnarsson, I.** (2009). Reconstructing web evolution and spider diversification in the  
7 molecular era. *PNAS* **106**, 5229–5234.
- 8 **Bond, J. E. and Opell, B. D.** (1998). Testing adaptive radiation and key innovation hypotheses  
9 in spiders. *Evolution (N. Y.)* **52**, 403–414.
- 10 **Borne, F., Kovalev, A., Gorb, S. and Courtier-Orgogozo, V.** (2020). The glue produced by  
11 *Drosophila melanogaster* for pupa adhesion is universal. *J. Exp. Biol.* **223**, jeb220608.
- 12 **Bott, R. A., Baumgartner, W., Bräunig, P., Menzel, F. and Joel, A. C.** (2017). Adhesion  
13 enhancement of cribellate capture threads by epicuticular waxes of the insect prey sheds  
14 new light on spider web evolution. *Proc. R. Soc. B Biol. Sci.* **284**, 20170363.
- 15 **Cartan, C. K. and Miyashita, T.** (2000). Extraordinary web and silk properties of Cyrtarachne  
16 (Araneae, Araneidae): a possible link between orb-webs and bolas. *Biol. J. Linn. Soc.* **71**,  
17 219–235.
- 18 **Choresh, O., Bayarmagnai, B. and Lewis, R. V.** (2009). Spider Web Glue: Two Proteins  
19 Expressed from Opposite Strands of the Same DNA Sequence. *Biomacromolecules* **10**,  
20 2852–2856.
- 21 **Chung, H. and Carroll, S. B.** (2015). Wax, sex and the origin of species: Dual roles of insect  
22 cuticular hydrocarbons in adaptation and mating. *BioEssays* **37**, 822–830.
- 23 **Coddington, J. A. and Levi, H. W.** (1991). Systematics and evolution of spiders (Araneae).  
24 *Annu. Rev. Ecol. Syst.* **22**, 565–592.
- 25 **Diaz, C., Tanikawa, A., Miyashita, T., Amarpuri, G., Jain, D., Dhinojwala, A. and**  
26 **Blackledge, T. A.** (2018). Supersaturation with water explains the unusual adhesion of  
27 aggregate glue in the webs of the moth-specialist spider, *Cyrtarachne akirai*. *R. Soc. Open*  
28 *Sci.* **5**, 181296.
- 29 **Diaz, C., Maksuta, D., Amarpuri, G., Tanikawa, A., Miyashita, T., Dhinojwala, A. and**

- 1        **Blackledge, T. A.** (2020). The moth specialist spider *Cyrtarachne akirai* uses prey scales  
2        to increase adhesion. *J. R. Soc. Interface* **17**, 20190792.
- 3        **Eisner, T., Alsop, R. and Ettershank, G.** (1964). Adhesiveness of spider silk. *Science* (80-. ).  
4        **146**, 1058–1061.
- 5        **Garrison, N. L., Rodriguez, J., Agnarsson, I., Coddington, J. A., Griswold, C. E., Hamilton,**  
6        **C. A., Hedin, M., Kocot, K. M., Ledford, J. M. and Bond, J. E.** (2016). Spider  
7        phylogenomics: Untangling the Spider Tree of Life. *PeerJ* **4**, e1719.
- 8        **Gorb, S.** (2001). *Attachment devices of insect cuticle*. New York, Boston, Dordrecht, London.  
9        Moscow: Kluwer Academic Publishers.
- 10       **Gullan, P. J. and Cranston, P. S.** (2014). *The insects: an outline of entomology*. Fifth. Oxford,  
11       UK: Wiley Blackwell.
- 12       **Jain, D., Amarpuri, G., Fitch, J., Blackledge, T. A. and Dhinojwala, A.** (2018). Role of  
13       Hygroscopic Low Molecular Mass Compounds in Humidity Responsive Adhesion of  
14       Spider's Capture Silk. *Biomacromolecules* **19**, 3048–3057.
- 15       **Masters, W. M. and Eisner, T.** (1990). The Escape Strategy of Green Lacewings from Orb  
16       Webs I. *J. Insect Behav.* **3**, 143–157.
- 17       **Nentwig, W.** (1982). Why Do Only Certain Insects Escape from a Spider's Web? *Oecologia*  
18       **53**, 412–417.
- 19       **Opell, B. D. and Bond, J. E.** (2001). Changes in the mechanical properties of capture threads  
20       and the evolution of modern orb-weaving spiders. *Evol. Ecol. Res.* **3**, 567–581.
- 21       **Opell, B. D., Karinshak, S. E. and Sigler, M. A.** (2011). Humidity affects the extensibility of an  
22       orb-weaving spider's viscous thread droplets. *J. Exp. Biol.* **214**, 2988–2993.
- 23       **Opell, B. D., Karinshak, S. E. and Sigler, M. A.** (2013). Environmental response and  
24       adaptation of glycoprotein glue within the droplets of viscous prey capture threads from  
25       araneoid spider orb-webs. *J. Exp. Biol.* **216**, 3023–3034.
- 26       **Penney, D.** (2004). Does the fossil record of spiders track that of their principal prey, the  
27       insects? *Trans. R. Soc. Edinburgh, Earth Sci.* **94**, 275–281.
- 28       **Sahni, V., Blackledge, T. A. and Dhinojwala, A.** (2010). Viscoelastic solids explain spider web  
29       stickiness. *Nat. Commun.* **1**, 19.

- 1 **Sahni, V., Blackledge, T. A. and Dhinojwala, A.** (2011). A review on spider silk adhesion. *J.*  
2 *Adhes.* **87**, 595–614.
- 3 **Sahni, V., Miyoshi, T., Chen, K., Jain, D., Blamires, S. J., Blackledge, T. A. and Dhinojwala,**  
4 **A.** (2014). Direct Solvation of Glycoproteins by Salts in Spider Silk Glues Enhances  
5 Adhesion and Helps To Explain the Evolution of Modern Spider Orb Webs.  
6 *Biomacromolecules* **15**, 1225–1232.
- 7 **Schneider, C. A., Rasband, W. S. and Eliceiri, K. W.** (2012). NIH Image to ImageJ: 25 years  
8 of image analysis. *Nat. Methods* **9**, 671–675.
- 9 **Singla, S., Amarpuri, G., Dhopatkar, N., Blackledge, T. A. and Dhinojwala, A.** (2018).  
10 Hygroscopic compounds in spider aggregate glue remove interfacial water to maintain  
11 adhesion in humid conditions. *Nat. Commun.* **9**, 1–8.
- 12 **Tarakanova, A. and Buehler, M. J.** (2012). The role of capture spiral silk properties in the  
13 diversification of orb webs. *J. R. Soc. Interface* **9**, 3240–3248.
- 14 **Townley, M. A. and Tillinghast, E. K.** (2013). Aggregate Silk Gland Secretions of Araneoid  
15 Spiders Selected aspects of spinning apparatus development in *Araneus cavaticus*. In  
16 *Spider Ecophysiology* (ed. Nentwig, W.), pp. 283–302. Berlin Heidelberg: Springer-Verlag.
- 17 **Townley, M. A., Bernstein, D. T., Gallagher, K. S. and Tillinghast, E. K.** (1991). Comparative  
18 study of orb web hygroscopicity and adhesive spiral composition in three araneid spiders  
19 Selected aspects of spinning apparatus development in *Araneus cavaticus*. *Artic. J. Exp.*  
20 *Zool.* **259**, 154–165.
- 21 **Vollrath, F. and Edmonds, D. T.** (1989). Modulation of the mechanical properties of spider silk  
22 by coating with water. *Nature* **340**, 305–307.
- 23 **Vollrath, F. and Selden, P.** (2007). The Role of Behavior in the Evolution of Spiders, Silks, and  
24 Webs. *Annu. Rev.* **38**, 819–846.
- 25 **Vollrath, F. and Tillinghast, E. K.** (1991). Glycoprotein Glue Beneath a Spider Web's Aqueous  
26 Coat. *Naturwissenschaften* **78**, 557–559.
- 27 **Vollrath, F., Fairbrother, W. J., Williams, R. J. P., Tillinghast, E. K., Bernstein, D. T.,**  
28 **Gallagher, K. S. and Townley, M. A.** (1990). Compounds in the droplets of the orb  
29 spider's viscid spiral. *Nature* **345**, 526–528.

- 1 **Wagner, T., Neinhuis, C. and Barthlott, W.** (1996). Wettability and Contaminability of Insect  
2 Wings as a Function of Their Surface Sculptures. *Acta Zool.* **77**, 213–225.
- 3 **Watson, J. A., Hu, H.-M., Cribb, B. W. and Watson, G. S.** (2011). Anti-Wetting on Insect  
4 Cuticle – Structuring to Minimise Adhesion and Weight. In *On Biomimetics* (ed. Lilyana, P.),  
5 pp. 395–418. Intech.
- 6

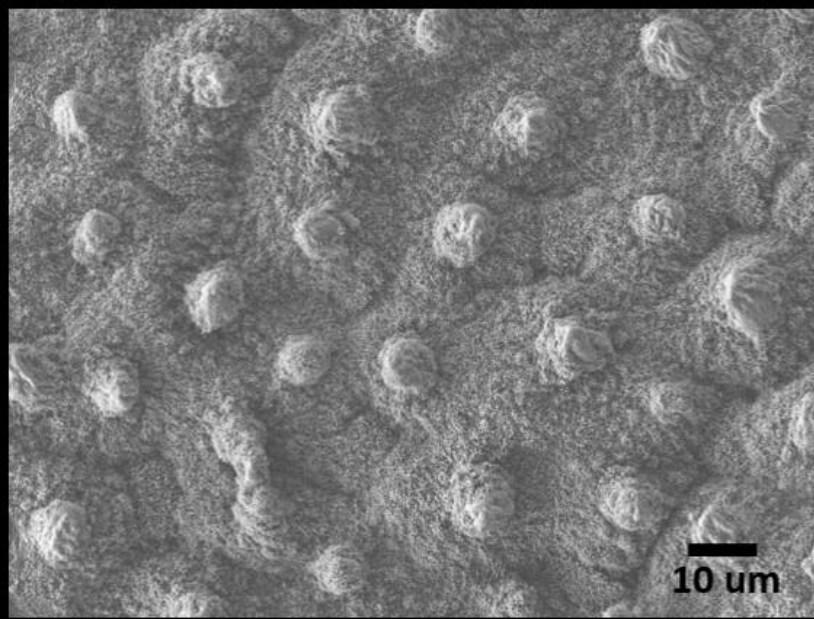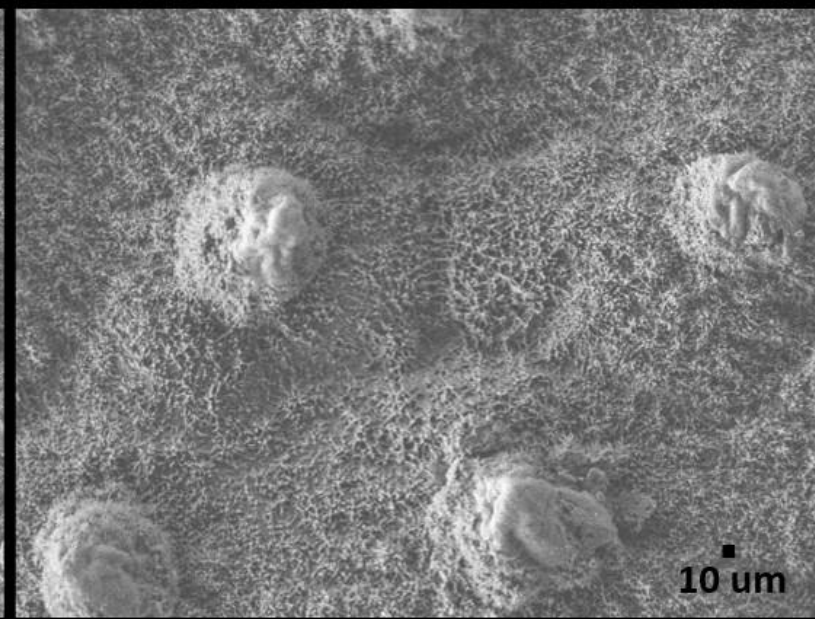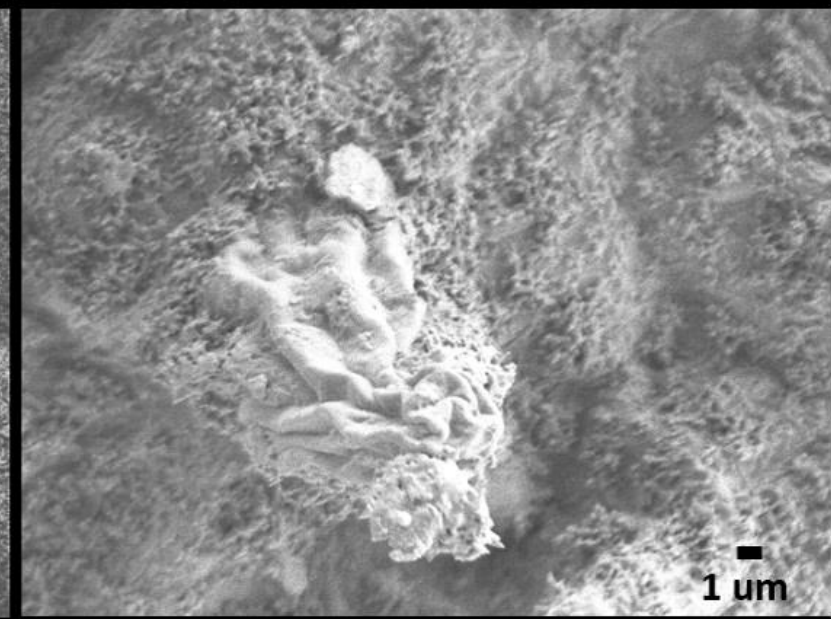



# Raw Lotus

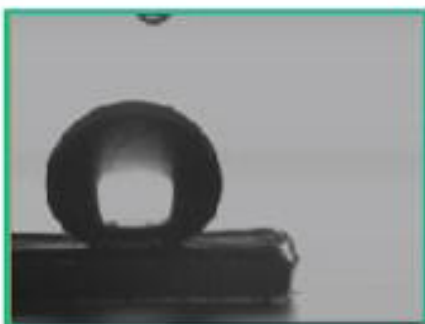

Contact Angle

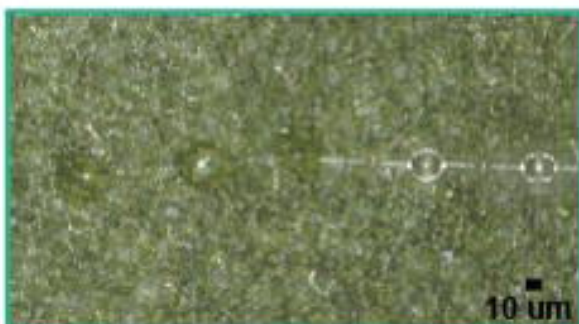

Optical Microscope

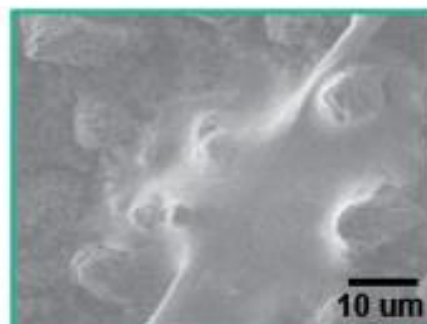

SEM

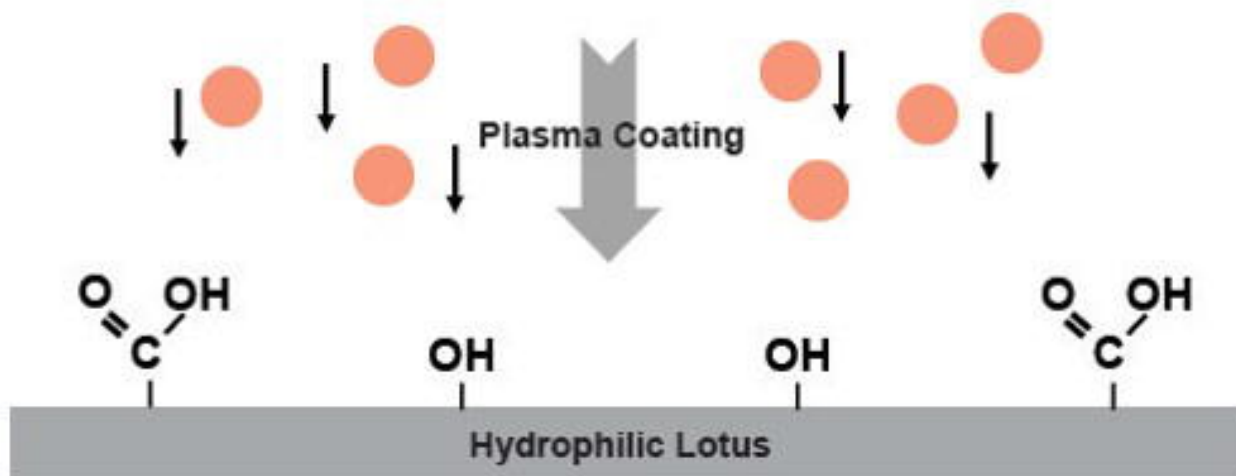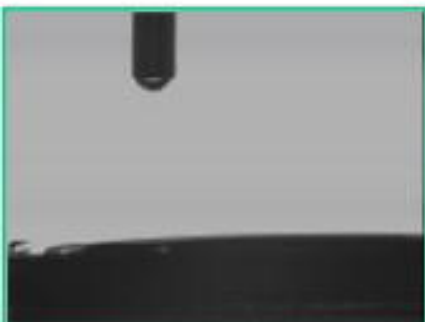

Contact Angle

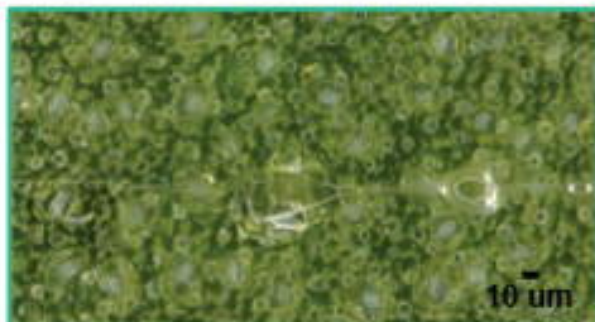

Optical Microscope

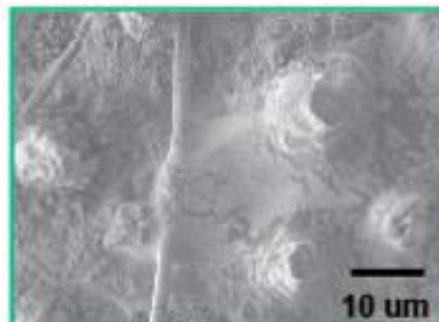

SEM

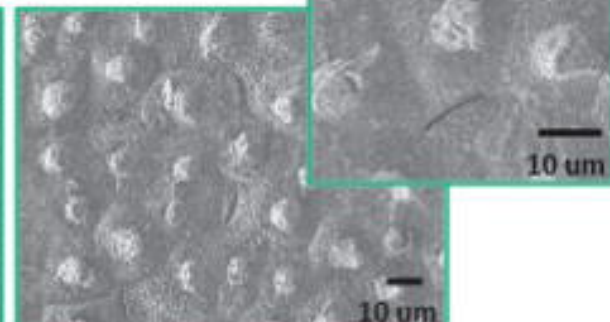

Stomata after vacuum

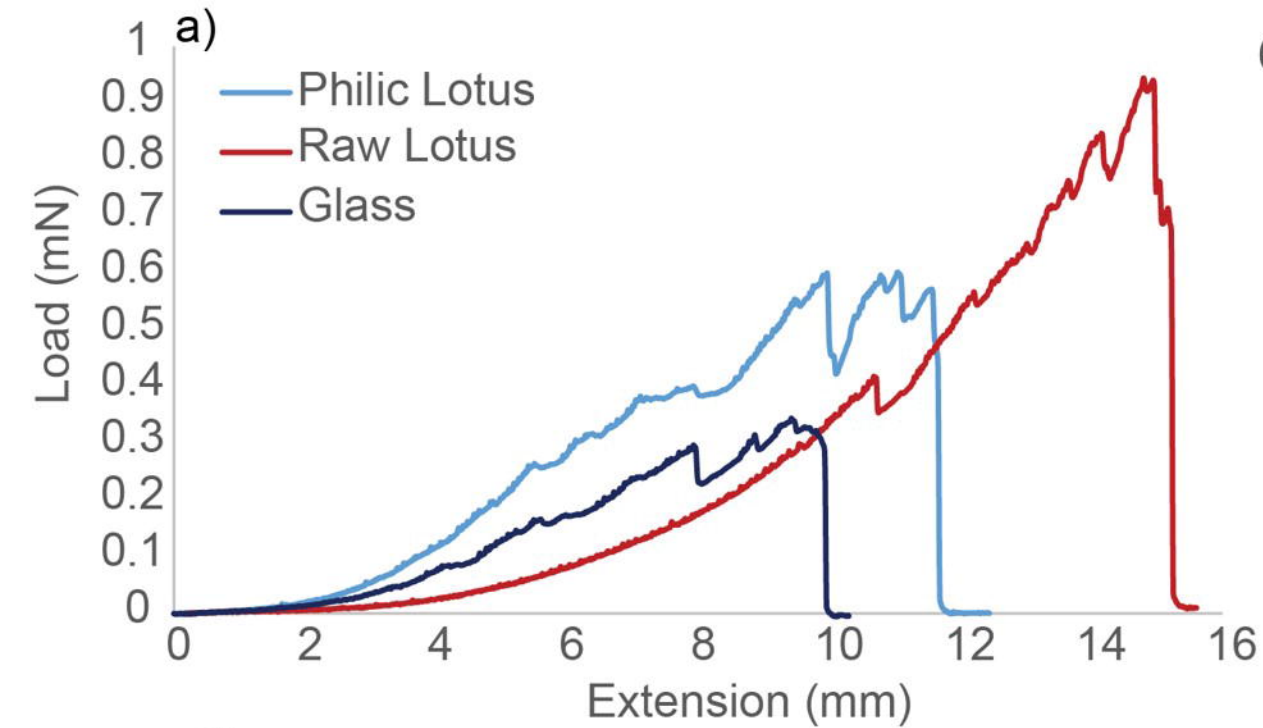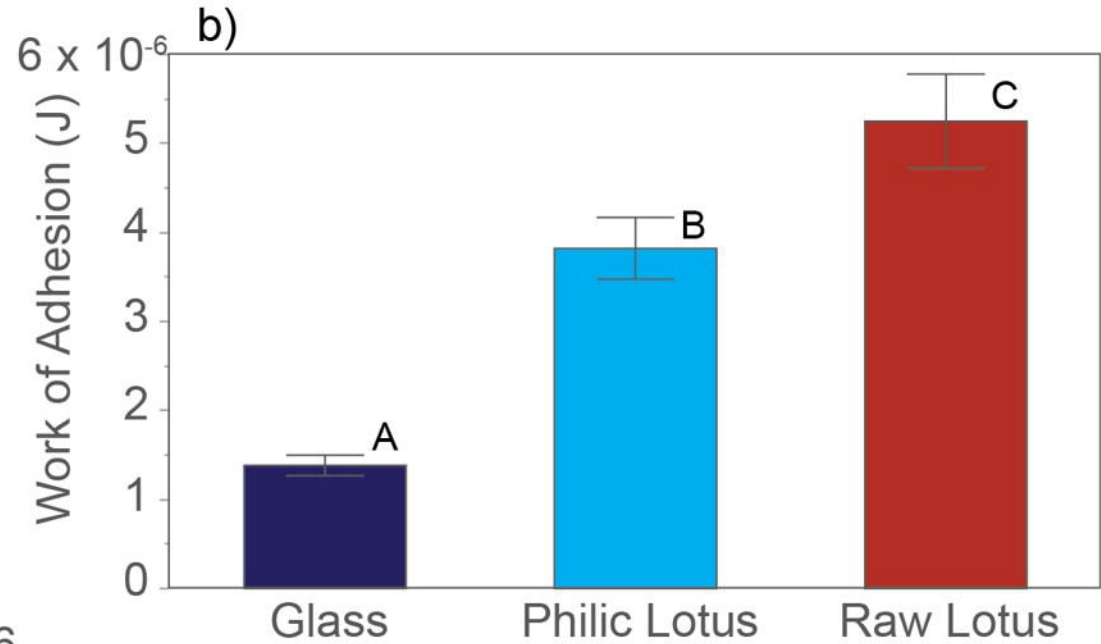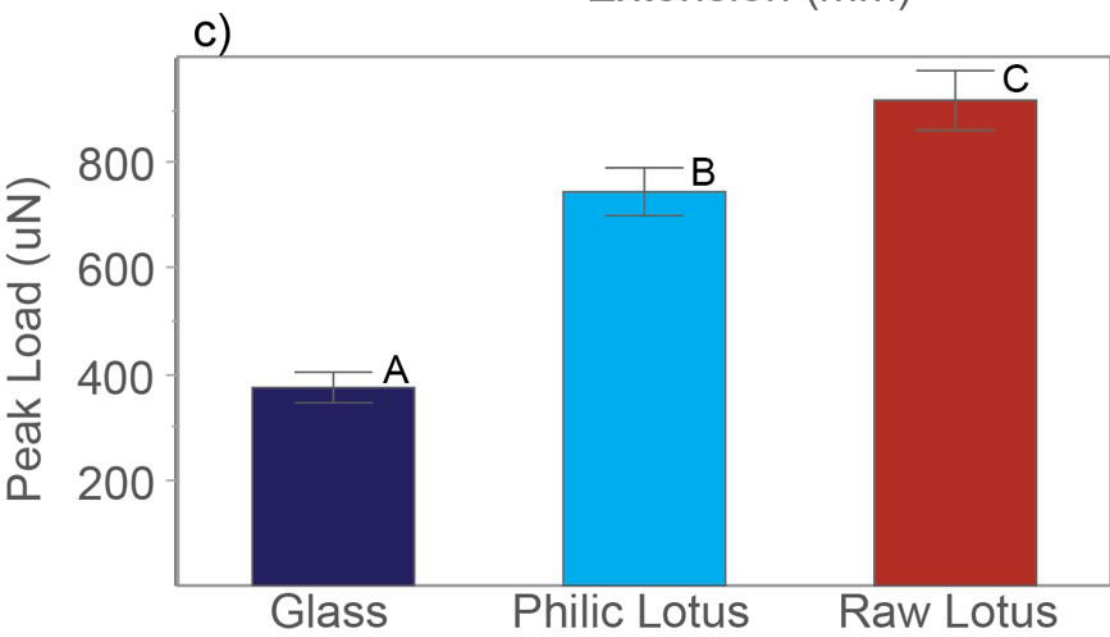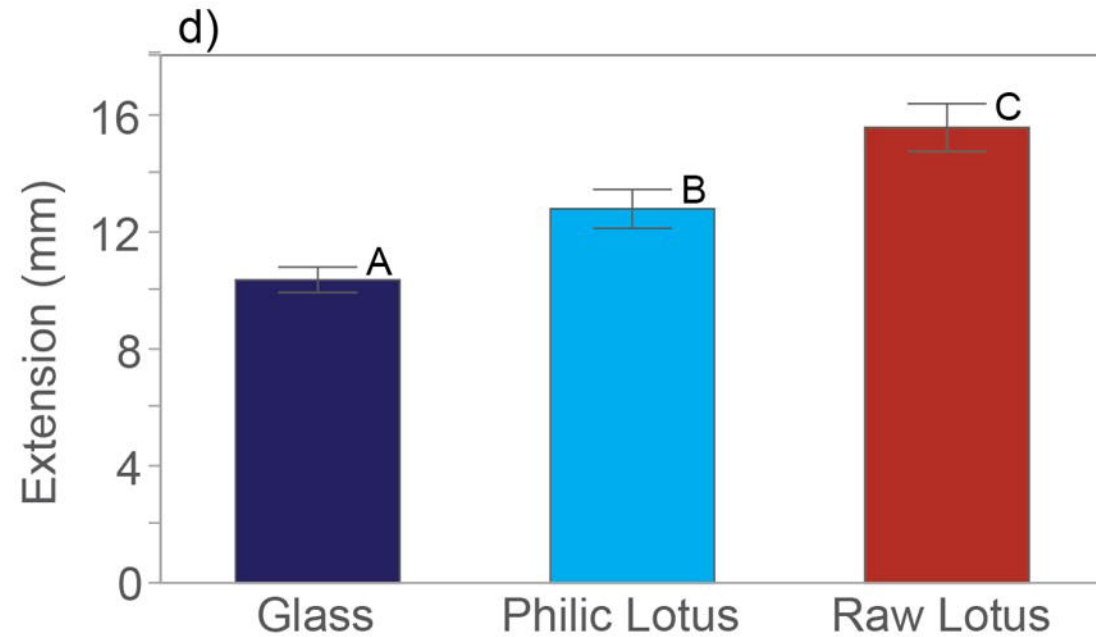

a)

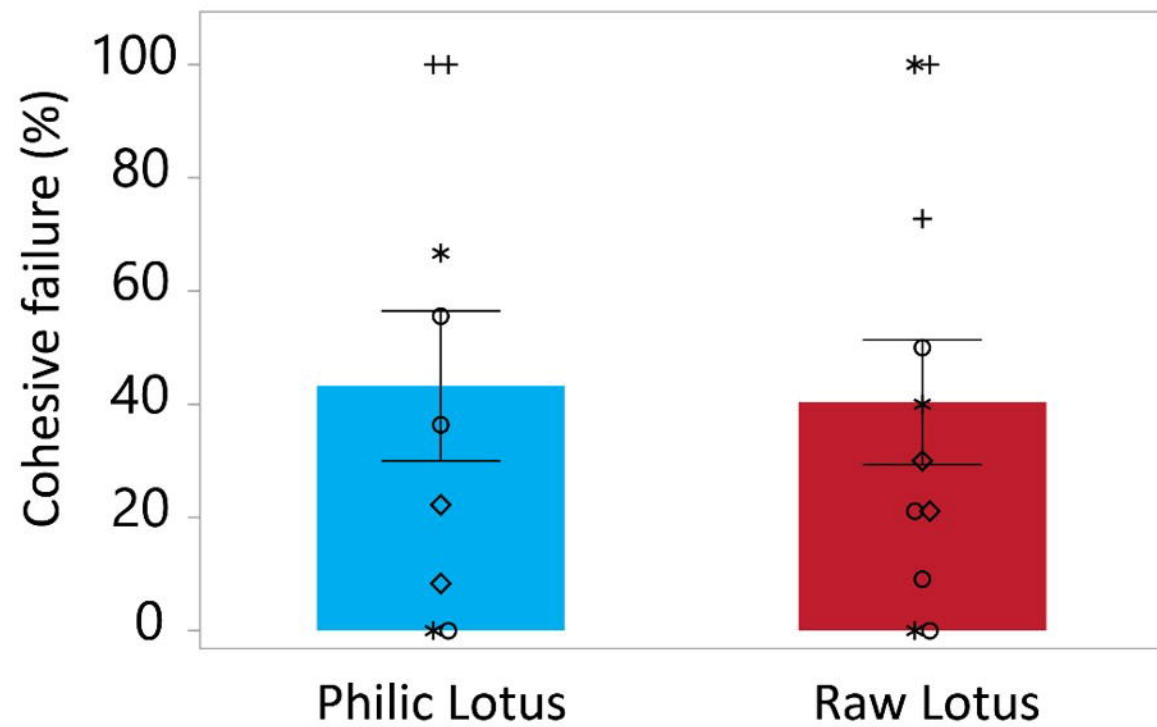

b)

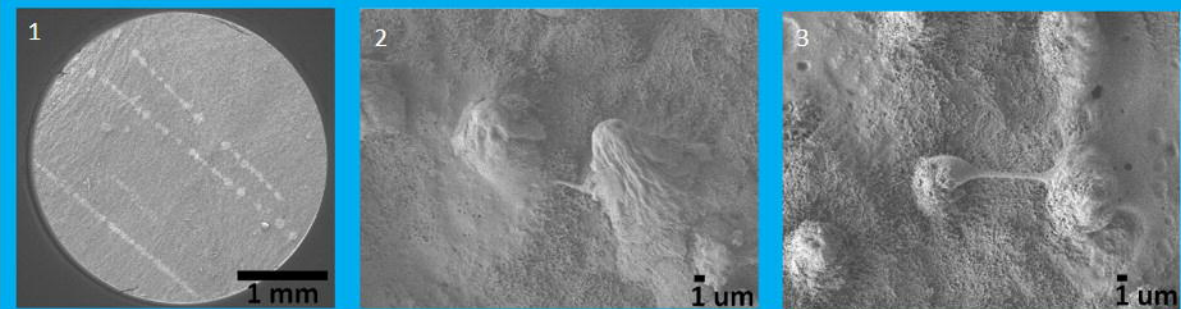

c)

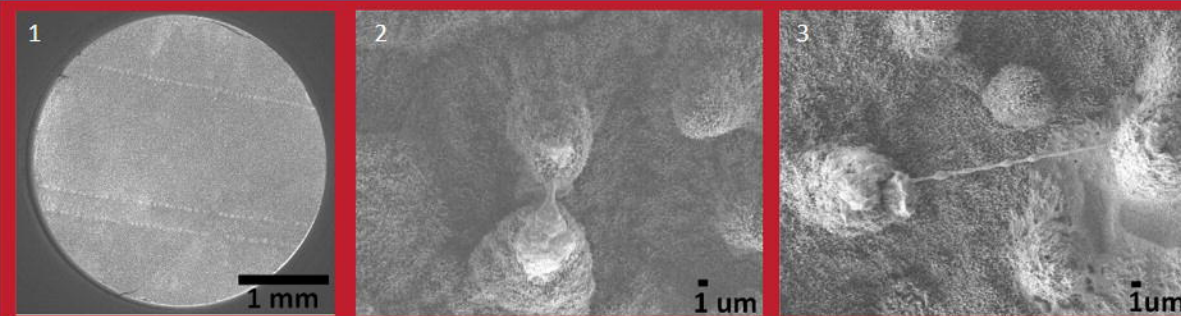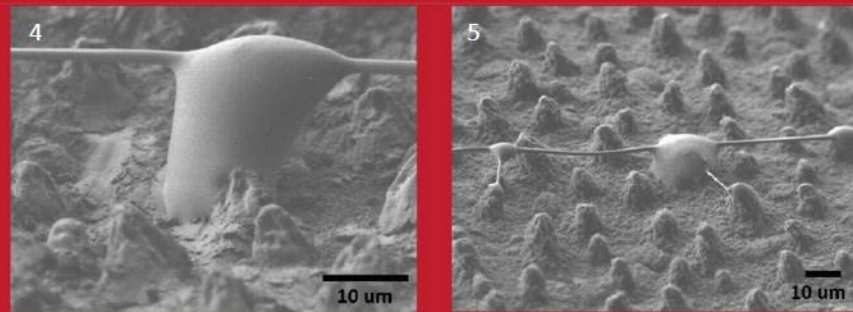



Initial Contact

Spreading for 6s

Left over glue after pull-off

a)

Hydrophilic Lotus

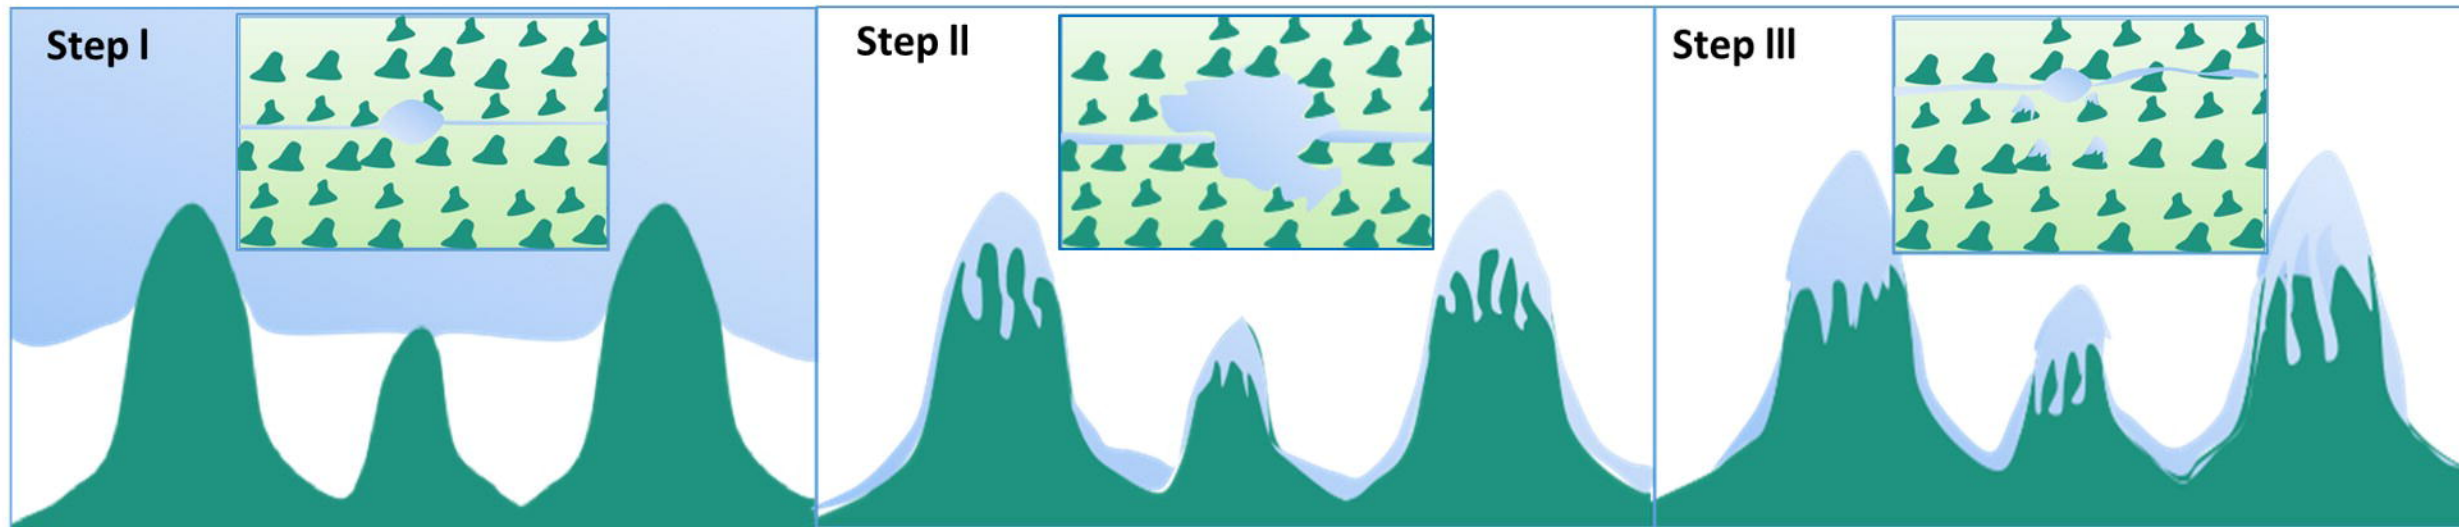

b)

Raw Lotus

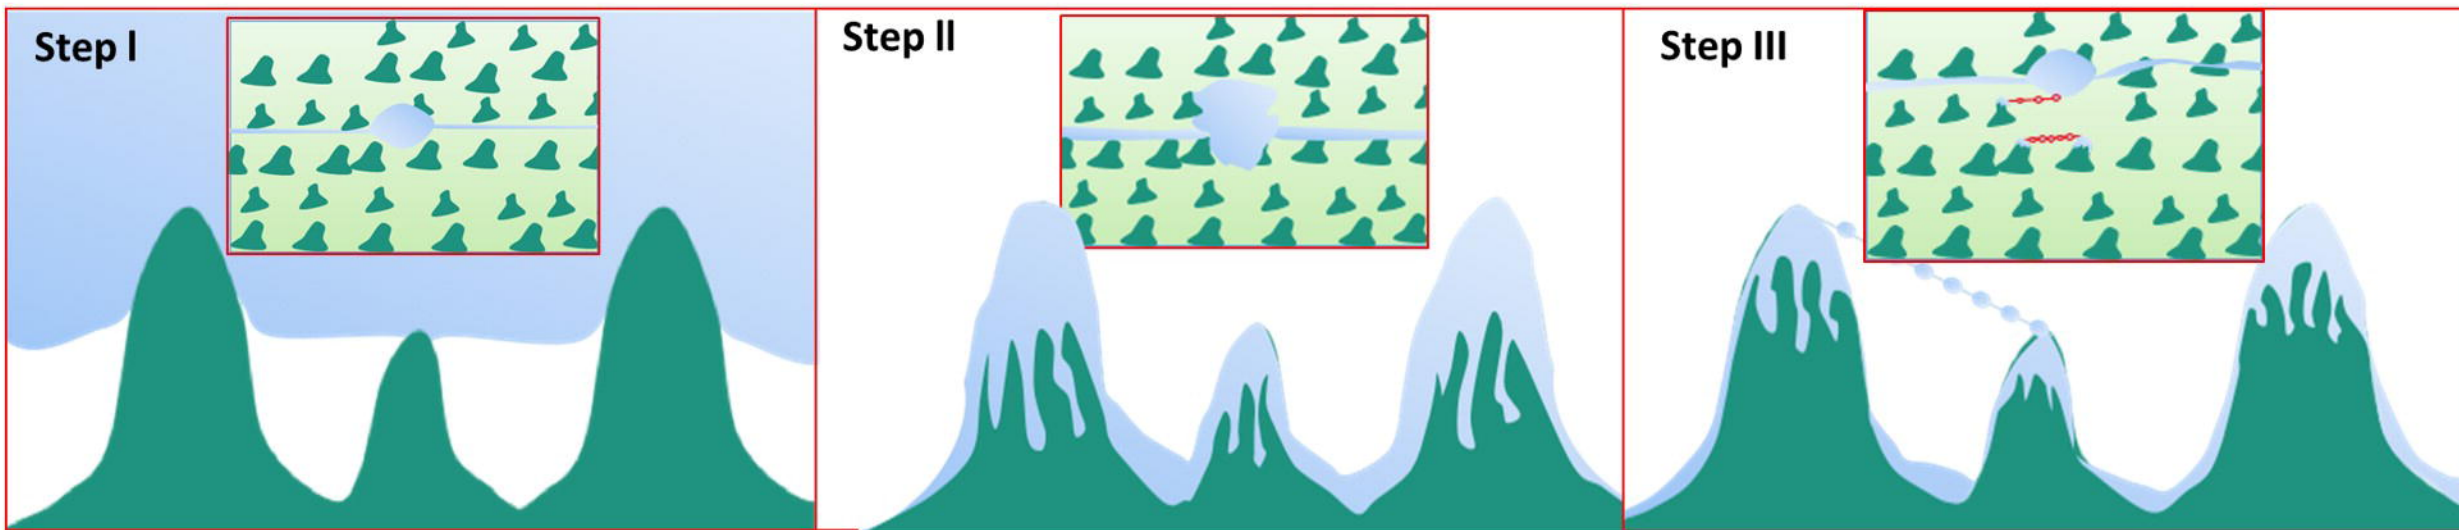

Source: https://www.biorxiv.org/content/biorxiv/early/2020/05/16/2020.05.15.098194.full.pdf
